# Supplementary material
Source: PubMed Central journal article supplement (PMC7832136)
Supplement: mmc1.pdf [file mmc1.pdf]

# THE LANCET

## Respiratory Medicine

### Supplementary appendix

This appendix formed part of the original submission. We post it as supplied by the authors.

Supplement to: Grasselli G, Tonetti T, Filippini C, et al. Pathophysiology of COVID-19-associated acute respiratory distress syndrome. *Lancet Respir Med* 2020; published online November 13. [http://dx.doi.org/10.1016/S2213-2600\(20\)30525-7](http://dx.doi.org/10.1016/S2213-2600(20)30525-7).

**ONLINE SUPPLEMENTAL APPENDIX  
TO:**

**AUTHORS' REPLY**

Giacomo Grasselli, MD, Tommaso Tonetti, MD, Claudia Filippini, PhD  
Arthur S. Slutsky, MD, Antonio Pesenti, MD and V. Marco Ranieri, MD

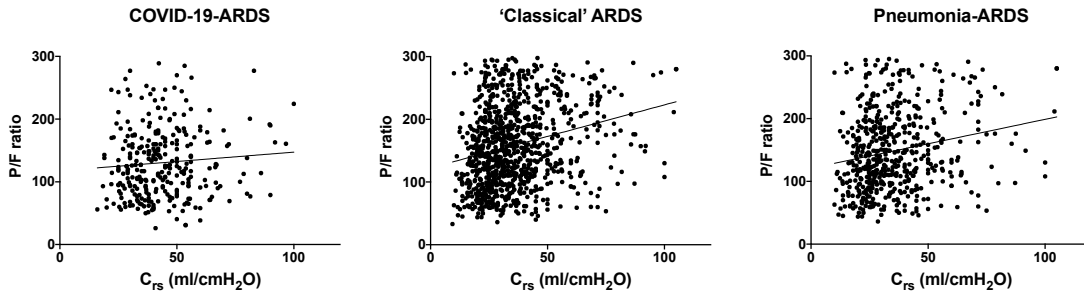

**Figure.** Scatterplots of static compliance versus  $\text{PaO}_2/\text{FiO}_2$  in COVID-19 ARDS, “classical” ARDS and pneumonia-ARDS. In COVID-19-ARDS (left panel), the relationship was not significant ( $p=0.160$ ) and  $R^2$  was 0.007. In classical and pneumonia ARDS, results were statistically significant ( $p<0.0001$ ) but values of  $R^2$  were low (0.059 and 0.040, respectively; equation  $y=1.005x+122.5$  and  $y=0.7777x+121.0$ , respectively; middle and right panels).
